# Supplementary material for: Efficient emission in copper-doped Cs3ZnX5 (X = Cl, I) for white LEDs and X-ray scintillators
Source: Royal Society of Chemistry journal article supplement (doi:10.1039/d3tc01657a), 2023-01-01
Supplement: d3tc01657a1.pdf [file d3tc01657a1.pdf]

Electronic Supplementary Information

# Efficient Emission in Copper-doped $\text{Cs}_3\text{ZnX}_5$ (X = Cl, I) for white LED and X- ray Scintillator

Yubin Yang,<sup>1</sup> Jianghua Wu,<sup>2</sup> Tianrui Zhou,<sup>1</sup> Yunluo Wang,<sup>1</sup> Jiaqian Zheng,<sup>3</sup> Ruifeng  
Liu,<sup>1</sup> Jingshan Hou,<sup>2</sup> Xiang Li,<sup>3</sup> Lianjun Wang,<sup>1</sup> Wan Jiang,<sup>1</sup> and Haijie Chen<sup>1,\*</sup>

*<sup>1</sup>State Key Laboratory for Modification of Chemical Fibers and Polymer Materials,  
Institute of Functional Materials, College of Materials Science and Engineering,  
Donghua University, Shanghai, 201620, China*

*<sup>2</sup>School of Materials Science and Engineering, Shanghai Institute of Technology,  
Shanghai, 201418, China*

*<sup>3</sup>Shanghai Institute of Ceramics, Chinese Academy of Sciences, Shanghai 201800,  
China*

Corresponding Author Email: [haijie.chen@dhu.edu.cn](mailto:haijie.chen@dhu.edu.cn)

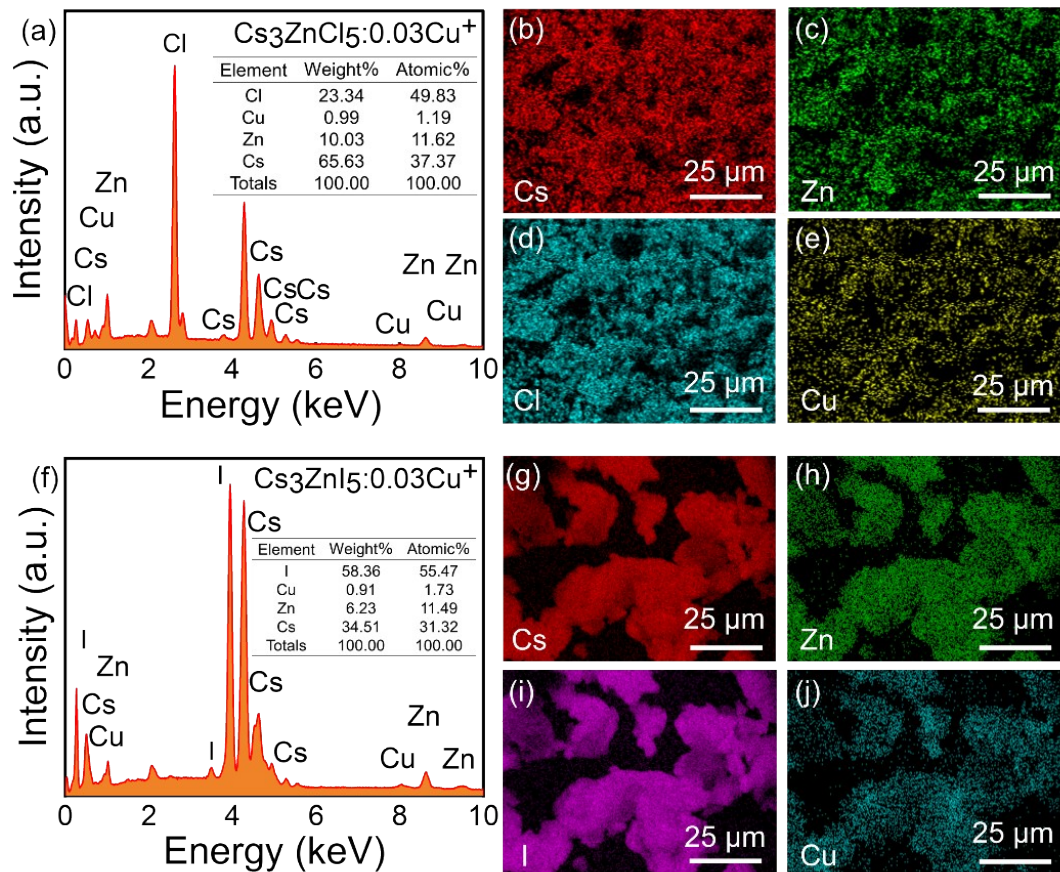

**Fig. S1** (a) EDS spectra of  $\text{Cs}_3\text{Zn}_{0.97}\text{Cu}_{0.03}\text{Cl}_{4.97}$ . (b-e) Elemental mapping of one representative particle of sample  $\text{Cs}_3\text{Zn}_{0.97}\text{Cu}_{0.03}\text{Cl}_{4.97}$ . (f) EDS spectra of  $\text{Cs}_3\text{Zn}_{0.97}\text{Cu}_{0.03}\text{I}_{4.97}$ . (g-j) Elemental mapping of one representative particle of sample  $\text{Cs}_3\text{Zn}_{0.97}\text{Cu}_{0.03}\text{I}_{4.97}$ .

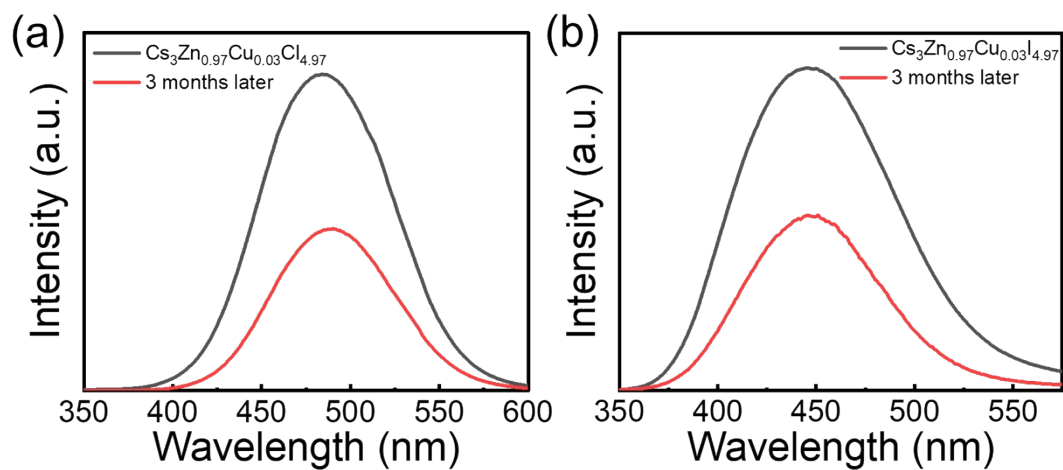

**Fig. S2** PL spectra of original crystals (a)  $\text{Cs}_3\text{Zn}_{0.97}\text{Cu}_{0.03}\text{Cl}_{4.97}$ , (b)  $\text{Cs}_3\text{Zn}_{0.97}\text{Cu}_{0.03}\text{I}_{4.97}$ , and the corresponding crystals after storage in air for three months.

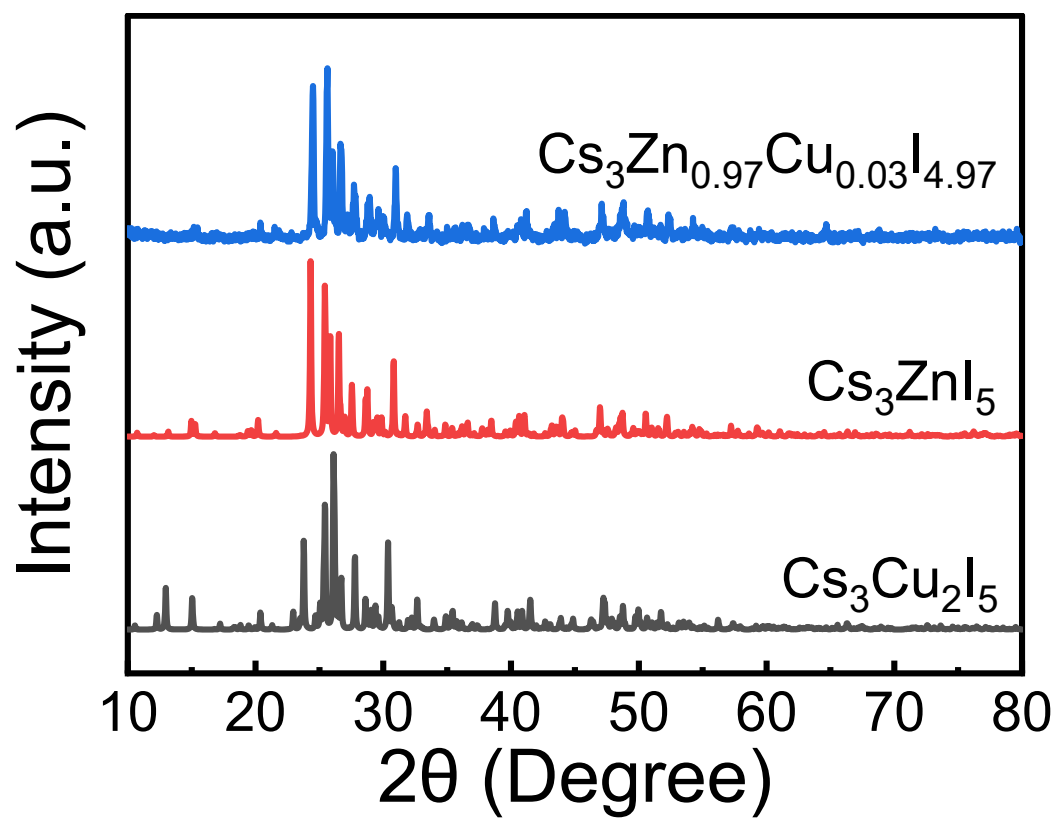

Fig. S3 XRD pattern of  $\text{Cs}_3\text{Zn}_{0.97}\text{Cu}_{0.03}\text{I}_{4.97}$  compared with  $\text{Cs}_3\text{Cu}_2\text{I}_5$  and  $\text{Cs}_3\text{ZnI}_5$ .

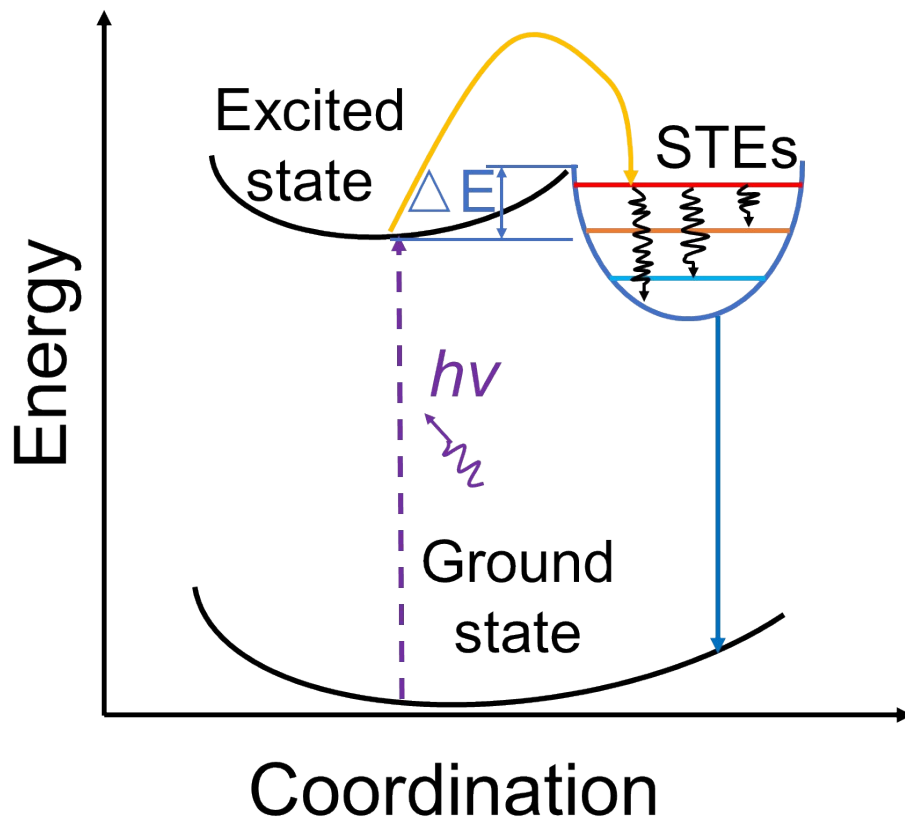

**Fig. S4** Schematic diagram of luminescence mechanism of copper-doped  $\text{Cs}_3\text{ZnX}_5$  ( $X = \text{Cl, I}$ ) series ( $\text{Cs}_3\text{Zn}_{1-x}\text{Cu}_x\text{X}_{5-x}$  ( $x = 0 - 0.15$ ))

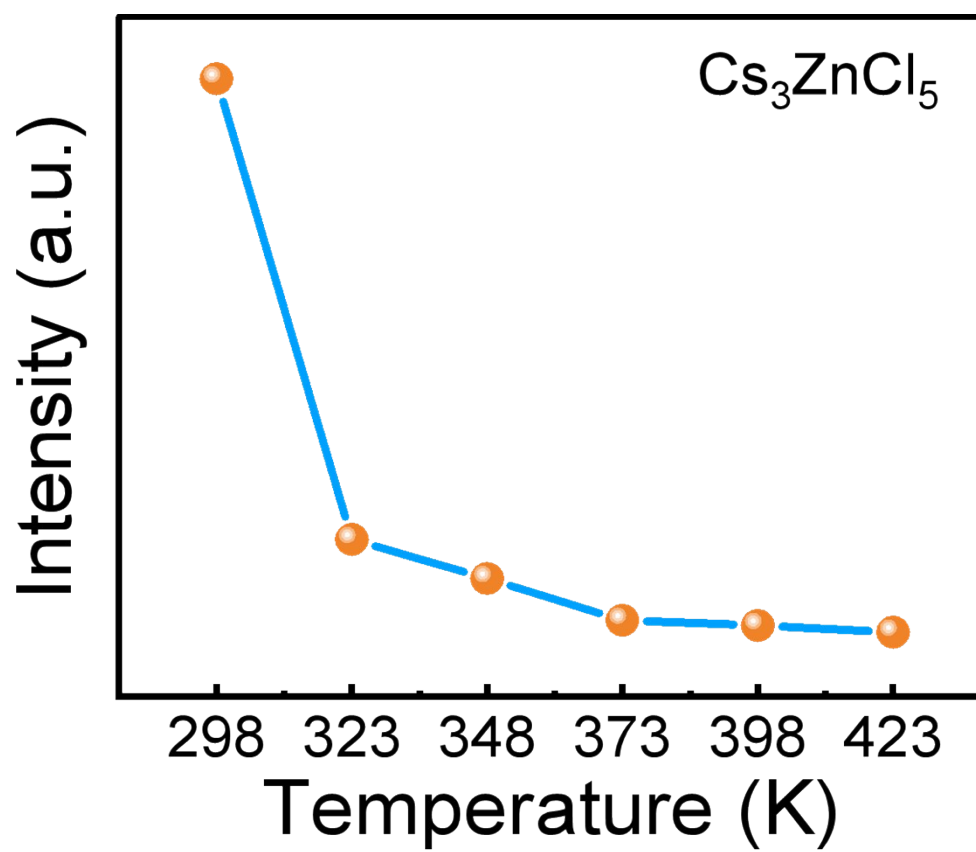

**Fig. S5** Variation of the emission intensity for  $\text{Cs}_3\text{ZnCl}_5$  with temperature.

**Table S1 Photoluminescence excitation (PLE), full width at half maximum (FWHM), quantum efficiency (PLQY), and chromaticity coordinates (x, y) of phosphors.**

| Sample no. | composition                                                   | $\lambda_{\text{exc}}$ (nm) | FWHM         | PLQY(%) | CIE(x,y)         |
|------------|---------------------------------------------------------------|-----------------------------|--------------|---------|------------------|
| 1          | $\text{Cs}_3\text{Zn}_{0.97}\text{Cu}_{0.03}\text{Cl}_{4.97}$ | 265                         | 120          | 90.2    | (0.1494, 0.2821) |
| 2          | $\text{Cs}_3\text{Zn}_{0.97}\text{Cu}_{0.03}\text{I}_{4.97}$  | 310                         | 70           | 11.6    | (0.1514, 0.1215) |
| 3          | CASN:Eu <sup>2+</sup>                                         | 440                         | 60           | 96.0    | (0.6470, 0.3470) |
| 4          | White-light LED                                               | Ra = 92.7                   | CCT = 4236 K |         | (0.3464, 0.2706) |
